# Supplementary material for: A near infrared fluorescent probe based on ICT for monitoring mitophagy in living cells
Source: Royal Society of Chemistry journal article supplement (doi:10.1039/c9an02053e), 2019-12-03
Supplement: c9an02053e1.pdf [file c9an02053e1.pdf]

## **A near infrared fluorescent probe based on ICT for monitoring mitophagy in living cells**

WenqingTang<sup>a,c</sup>, Youzhi Dai<sup>b,d\*</sup>, Biao Gu<sup>c</sup>, Mengqin Liu<sup>c</sup>, ZhengjiYi<sup>c</sup>, Zhongliang Li<sup>a</sup>, Zhimin Zhang<sup>c</sup>, Huiyan He<sup>c</sup>, Rongying Zeng<sup>c\*</sup>

<sup>a</sup> School of Chemical Engineering, Xiangtan University, Xiangtan, Hunan 411105, People's Republic of China

<sup>b</sup> College of Environmental and Resources, Xiangtan University, Xiangtan, Hunan 411105, People's Republic of China

<sup>c</sup> Key Laboratory of Functional Organometallic Materials of College of Hunan Province, College of Chemistry and Material Science, Hengyang Normal University, Hengyang, 421008, People's Republic of China

<sup>d</sup> Hunan 2011 Collaborative Innovation Center of Chemical Engineering & Technology with Environmental Benignity and Effective Resource Utilization

\*Corresponding author.

Tel.: +86 0734 8484932; Fax: +86 0734 8484932

E-mail: zengry13@163.com

Tel.: +86 18975283398;

E-mail: daiyzh@xtu.edu.cn

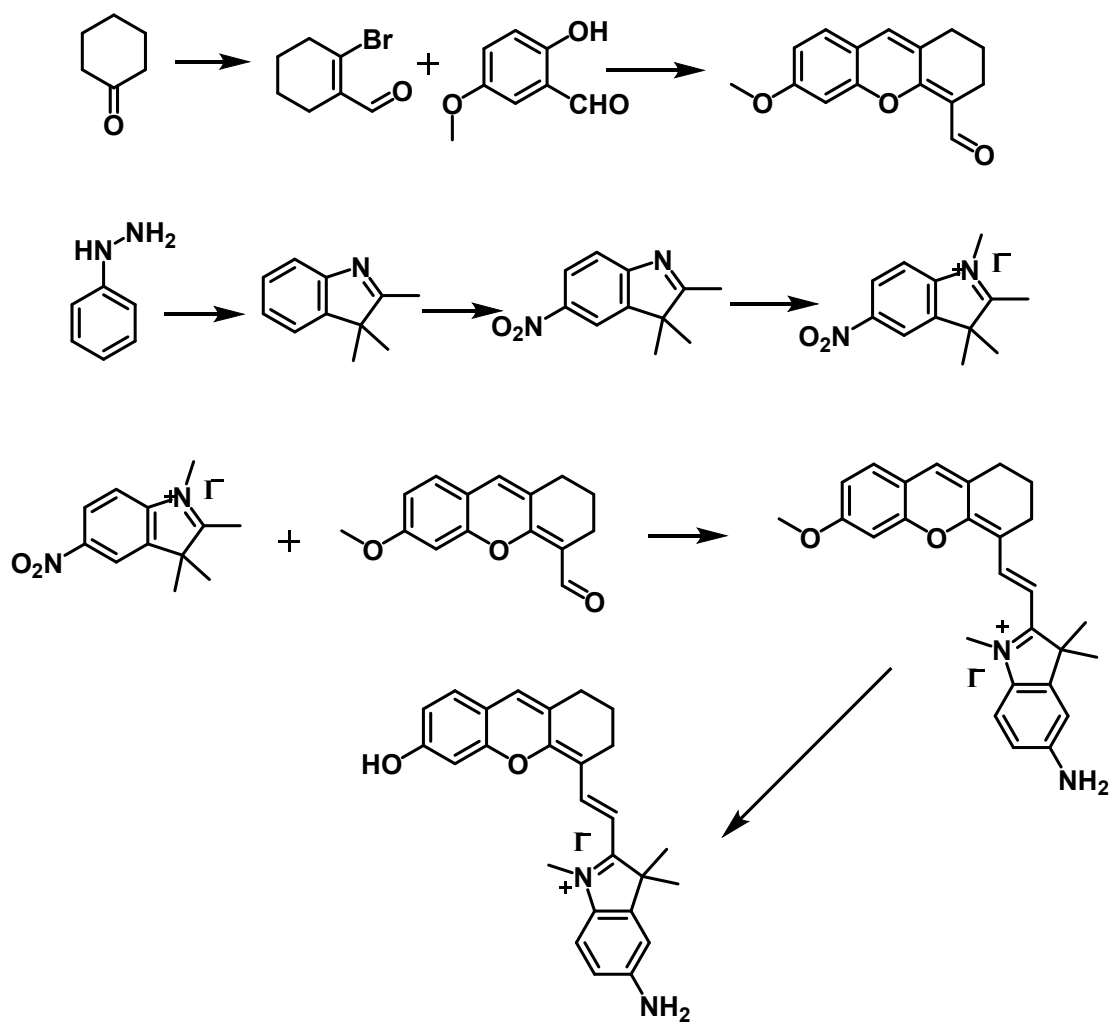

Scheme S1. Synthetic routes for Cy-NH<sub>2</sub>.

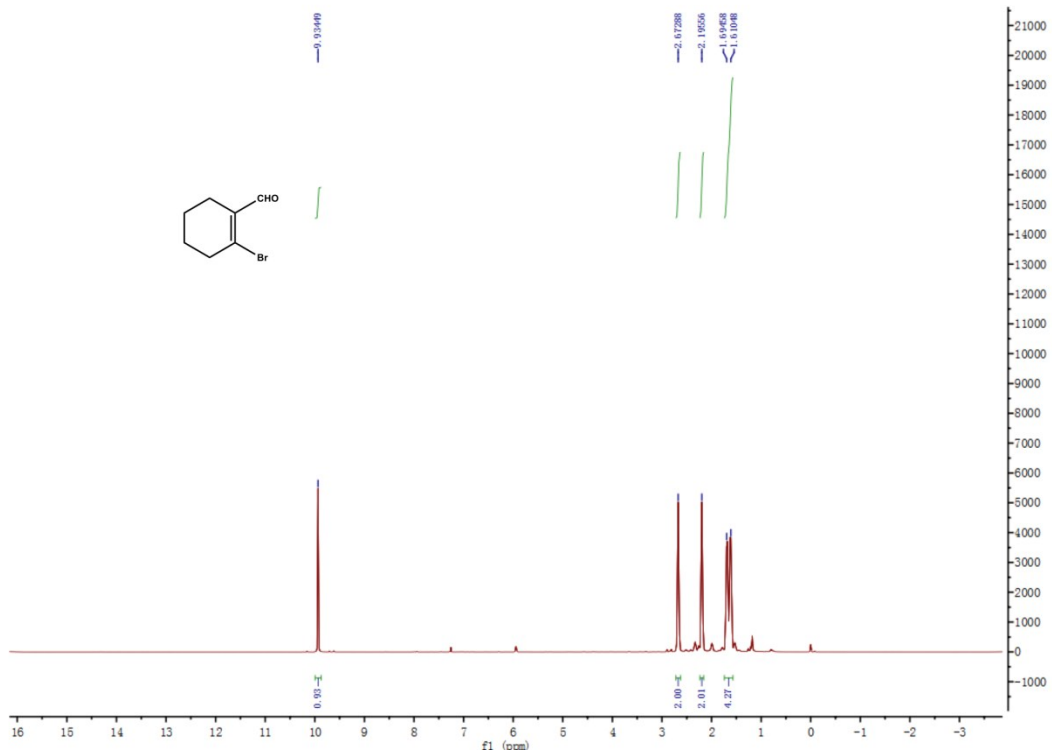

**Figure S1.**  $^1\text{H-NMR}$  spectrum of 2-bromocyclohex-1-ene-1-carbaldehyde

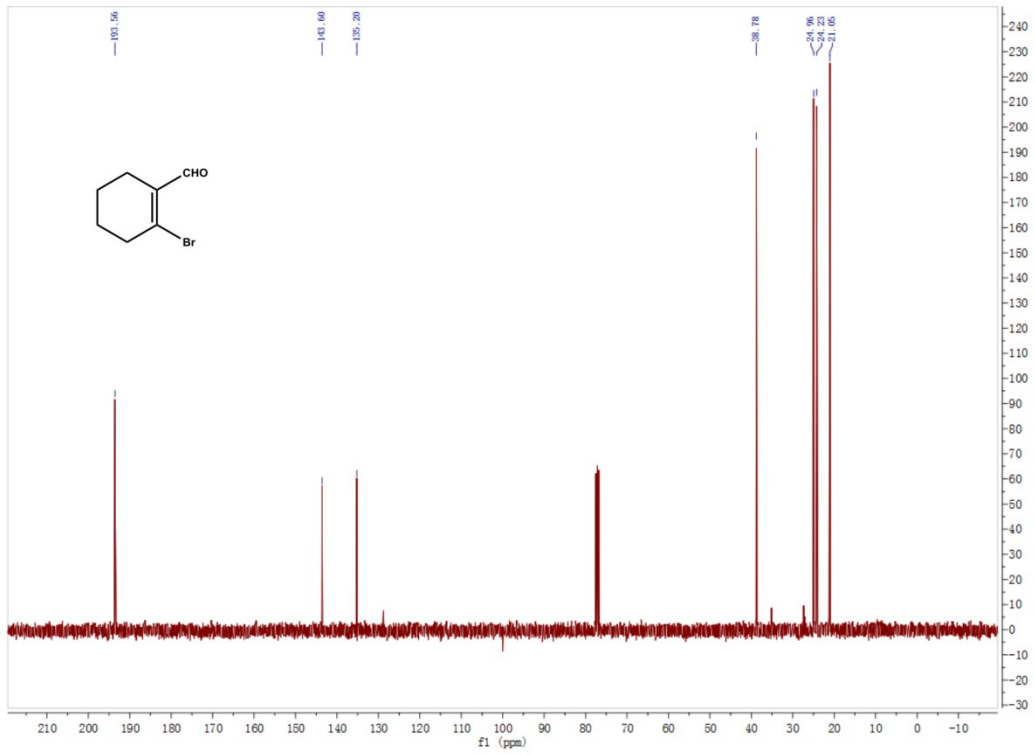

**Figure S2.**  $^{13}\text{C}$ -NMR spectrum of 2-bromocyclohex-1-ene-1-carbaldehyde

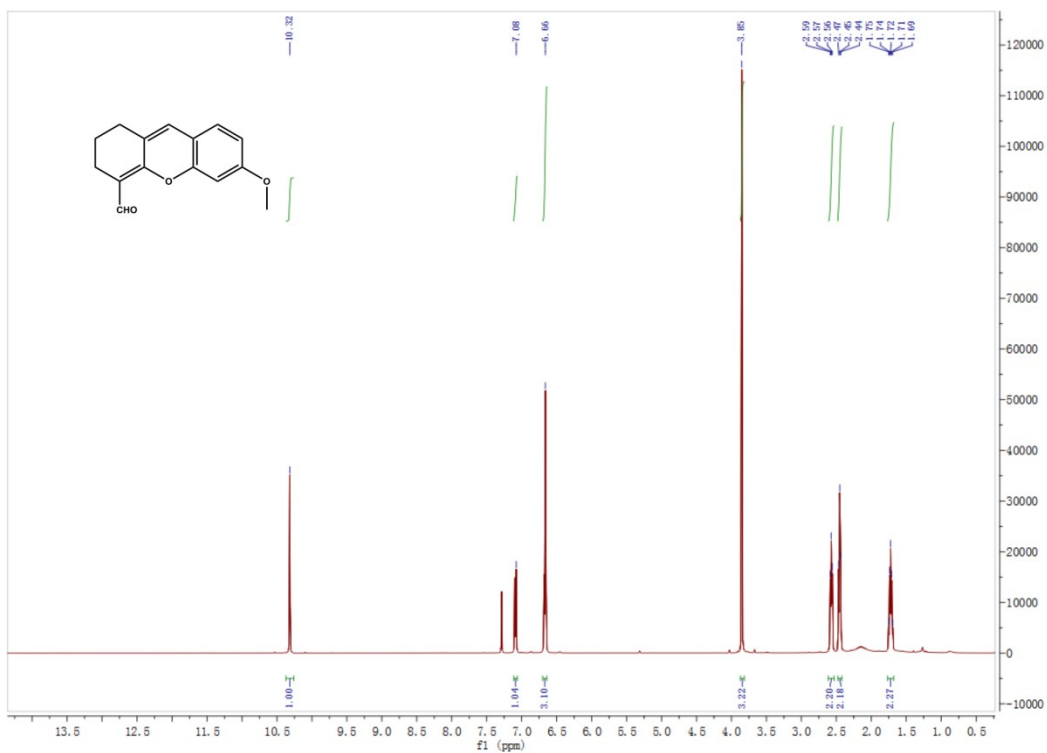

**Figure S3.** <sup>1</sup>H-NMR spectrum of 6-methoxy-2,3-dihydro-1H-xanthene-4-carbaldehyde

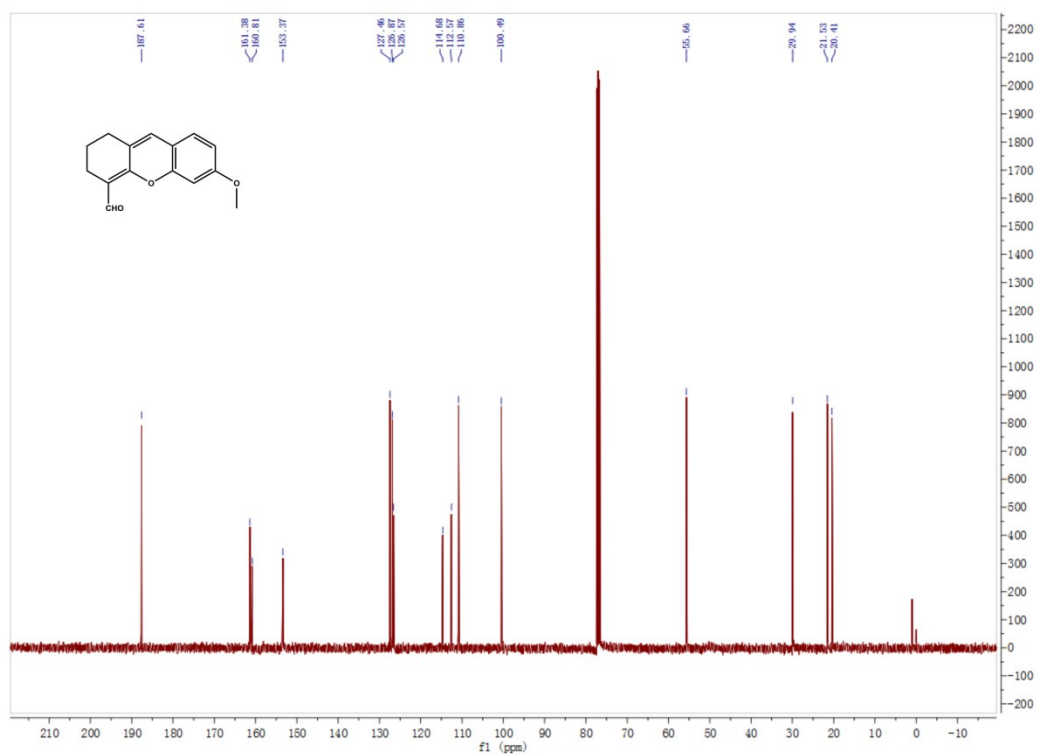

**Figure S4.**  $^{13}\text{C}$ -NMR spectrum of 6-methoxy-2,3-dihydro-1H-xanthene-4-carbaldehyde

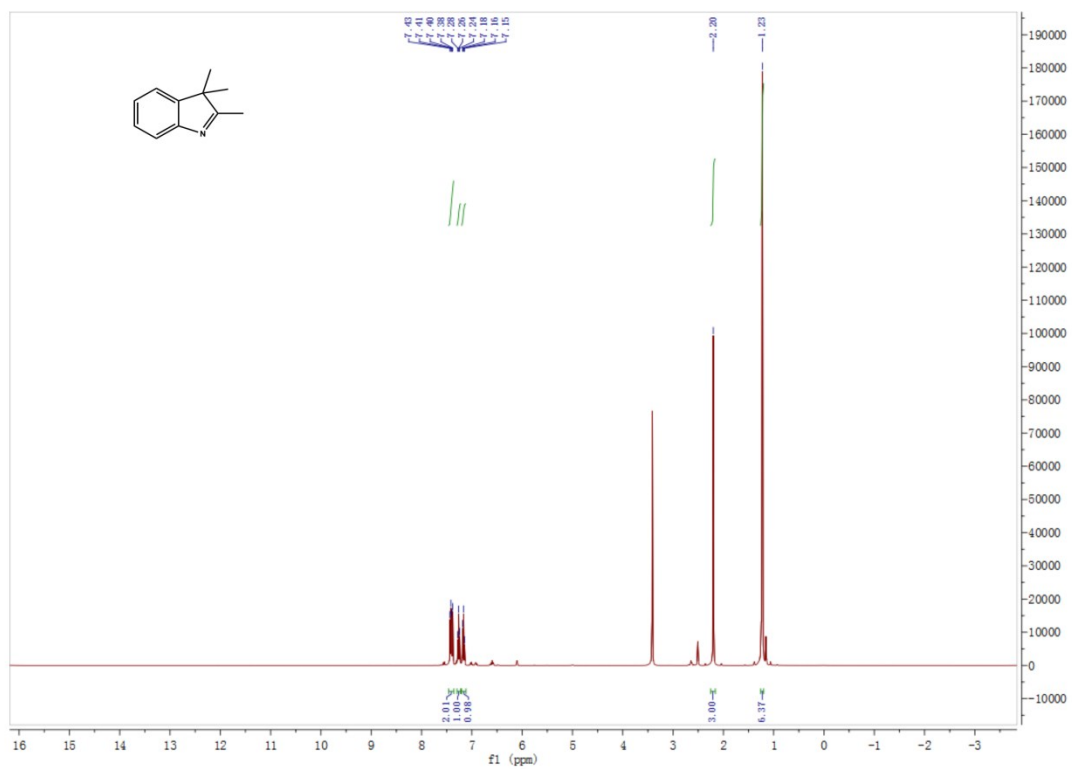

**Figure S5.**  $^1\text{H-NMR}$  spectrum of 2,3,3-trimethyl-3H-indole

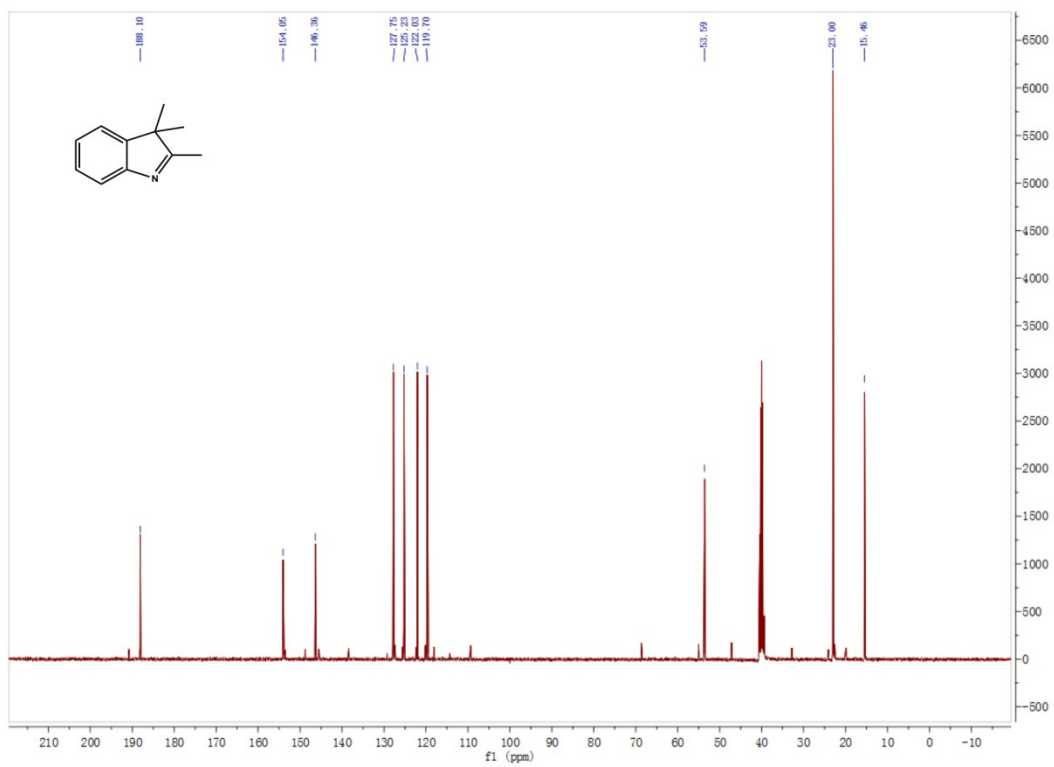

**Figure S6.**  $^{13}\text{C}$ -NMR spectrum of 2,3,3-trimethyl-3H-indole



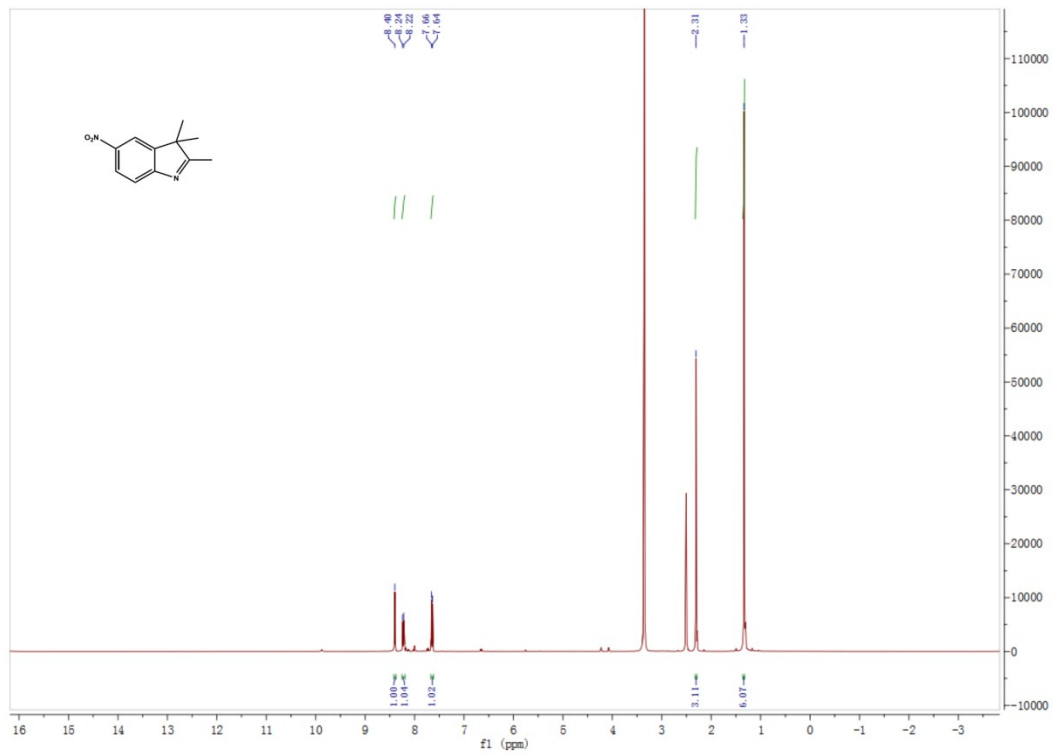

**Figure S7.** <sup>1</sup>H-NMR spectrum of 2,3,3-trimethyl-5-nitro-3H-indole

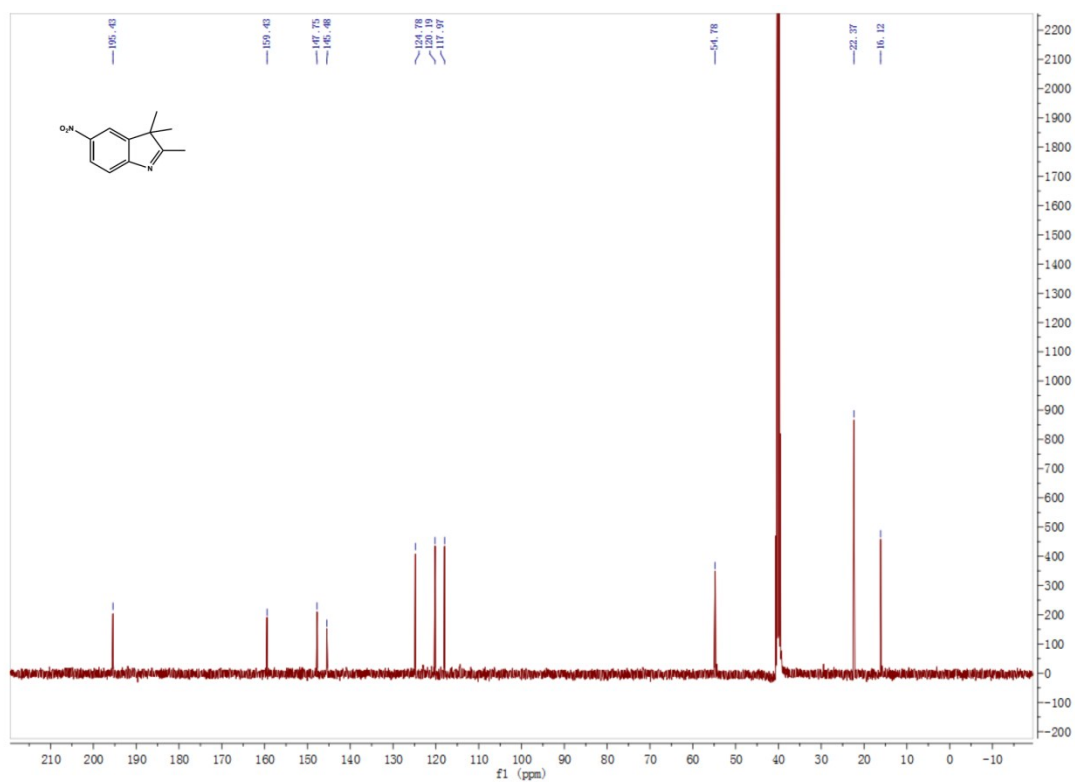

**Figure S8.**  $^{13}\text{C}$ -NMR spectrum of 2,3,3-trimethyl-5-nitro-3H-indole

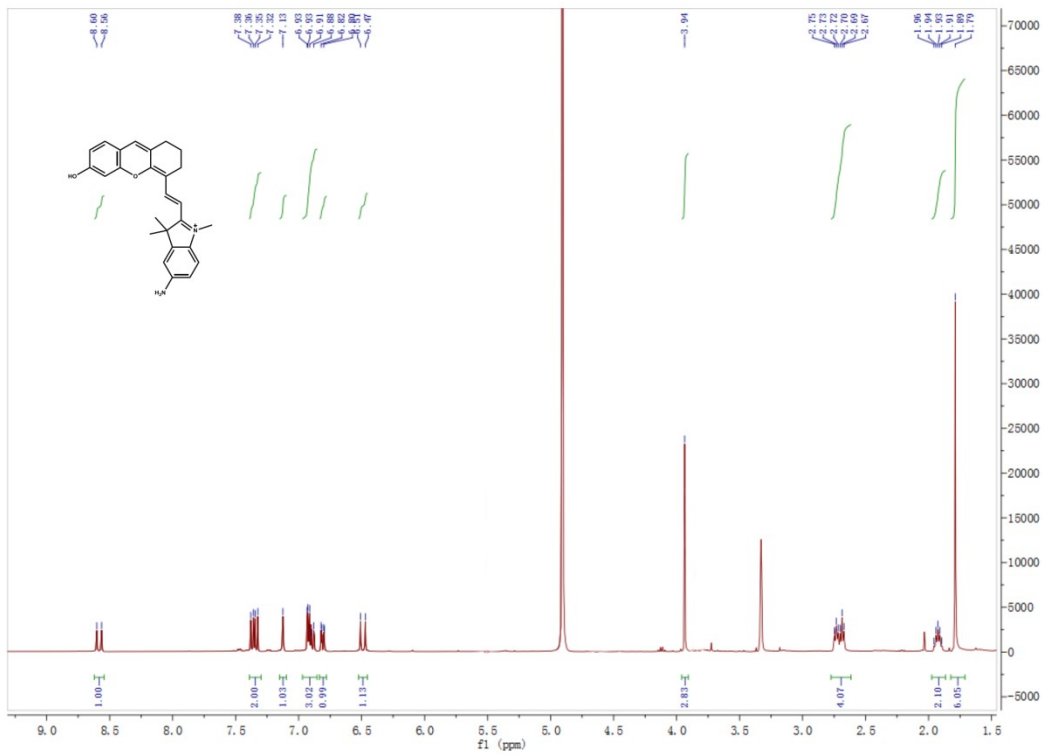

**Figure S9.**  $^1\text{H-NMR}$  spectrum of Cy- $\text{NH}_2$

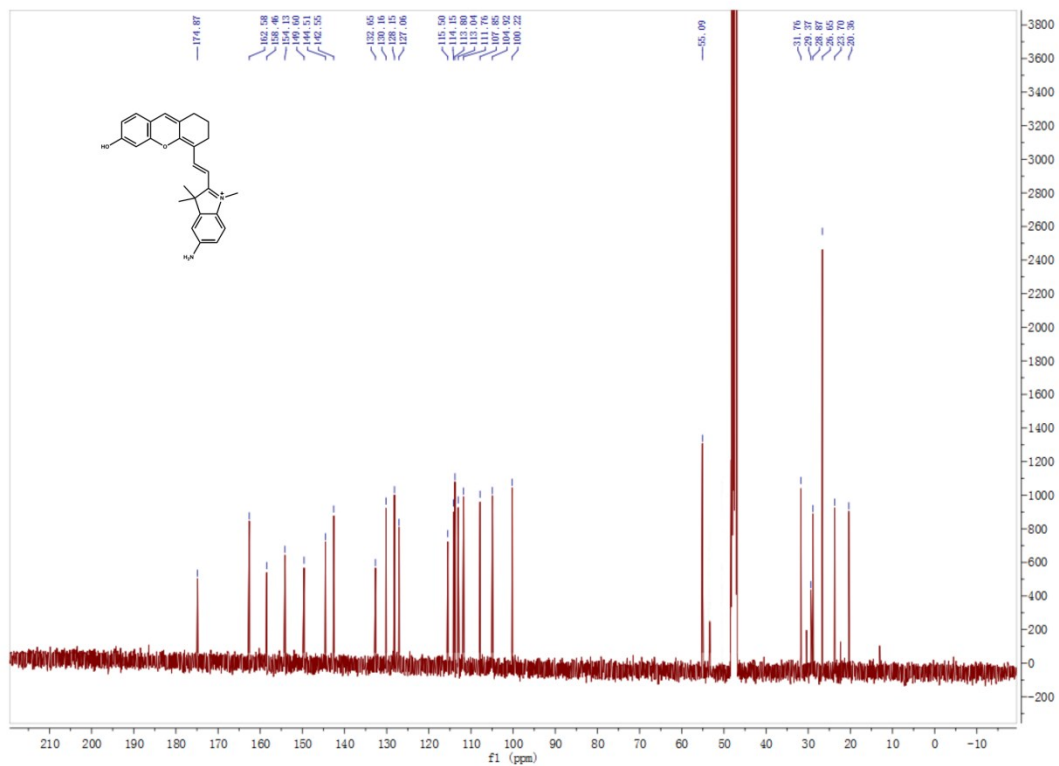

**Figure S10.**  $^{13}\text{C}$ -NMR spectrum of Cy-NH<sub>2</sub>

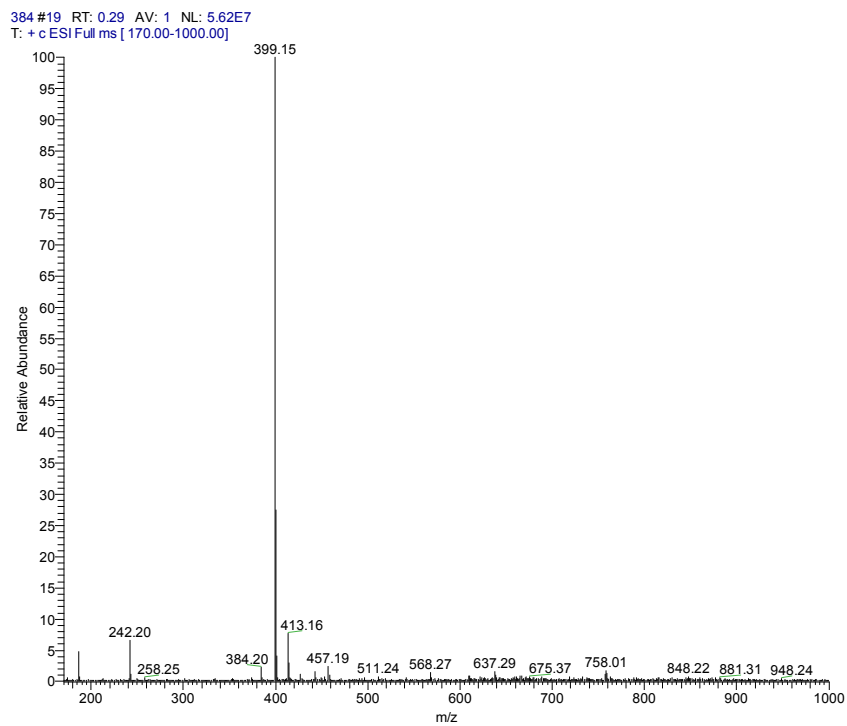

**Figure S11.** Mass spectrum of  $\text{Cy-NH}_2$

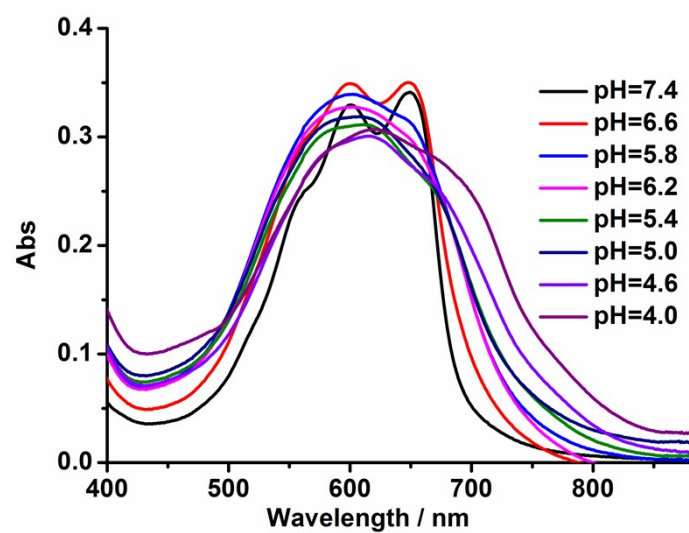

**Figure S12.** The absorption spectra of 10  $\mu\text{M}$  probe in different pH contains 1.0% DMSO.

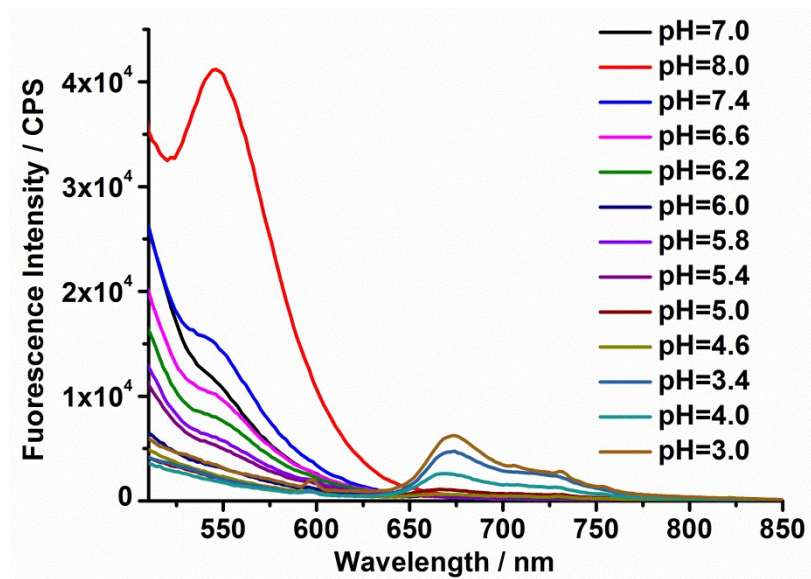

**Figure S13.** The fluorescence spectra of 10 μM probe in different pH contains 1.0% DMSO.

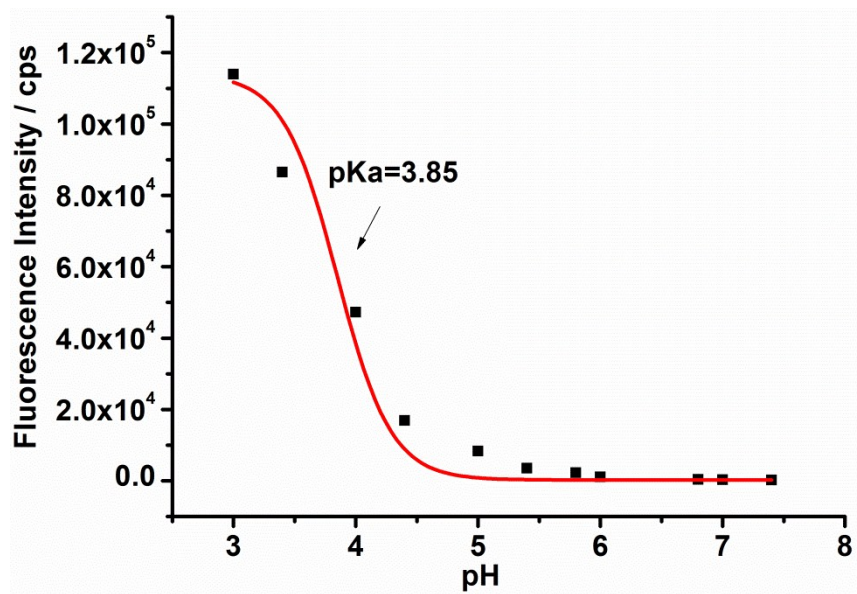

**Figure S14.** Sigmoidal fitting the pH-dependent fluorescence intensity at 670 nm.



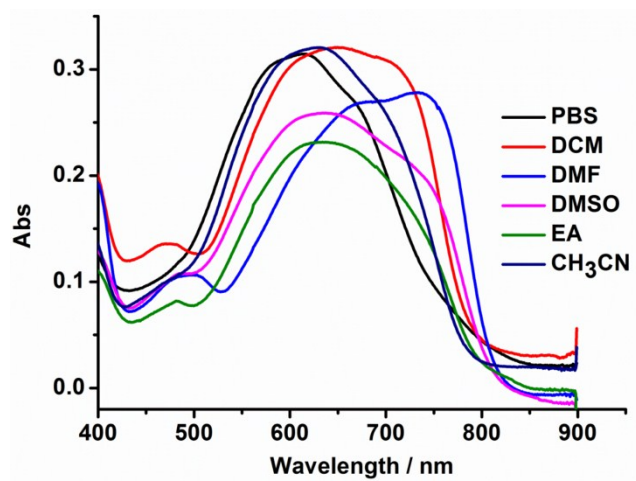

**Figure S15.** The absorption spectra of 10 μM probe in different solvents

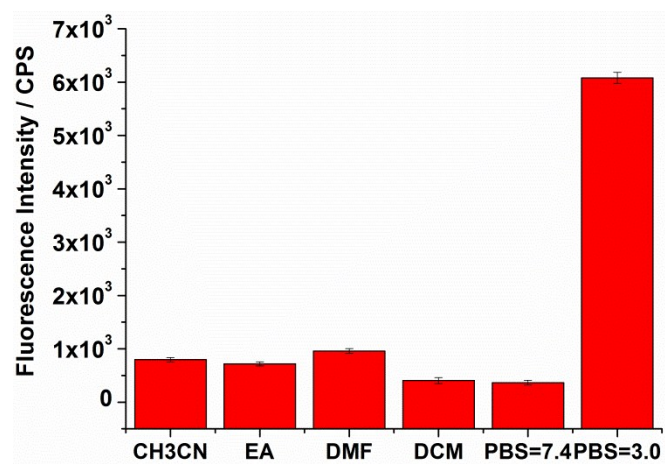

**Figure S16.** The fluorescence spectra of 10 μM probe in different solvents. (Em: 670 nm)

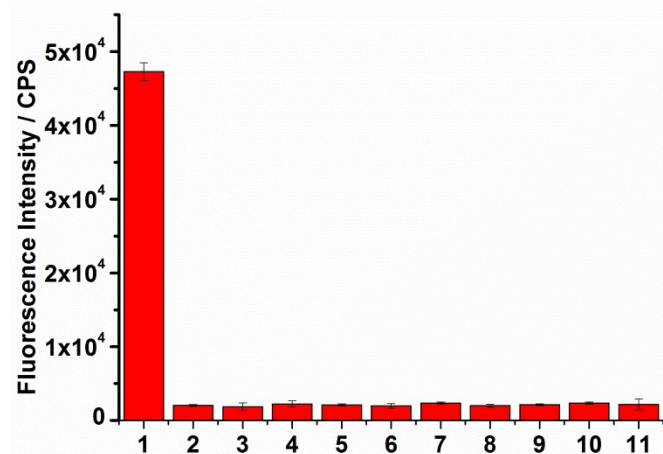

**Figure S17.** The fluorescence spectra of 10  $\mu$ M probe in different compounds. 1. pH=4.0; 2. Cys (200  $\mu$ M); 3. Hcy (200  $\mu$ M); 4. GSH (5.0 mM); 5. Leu (100  $\mu$ M); 6. H<sub>2</sub>O<sub>2</sub> (100  $\mu$ M); 7. ClO<sup>-</sup> (100  $\mu$ M); 8. Na<sup>+</sup> (100 mM); 9. Fe<sup>2+</sup> (100  $\mu$ M); 10. K<sup>+</sup> (5.0 mM) and 11. Cl<sup>-</sup> (100 mM).

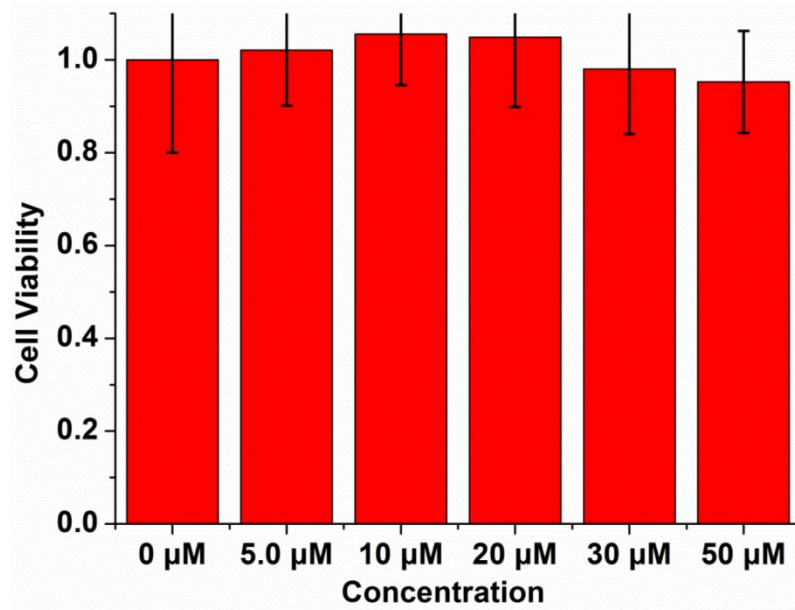

**Figure S18.** Cell viability estimated by MTT assay. MCF-7 cells were incubated with different concentrations of Cy-NH<sub>2</sub> (0-50 μM) for 24 h.

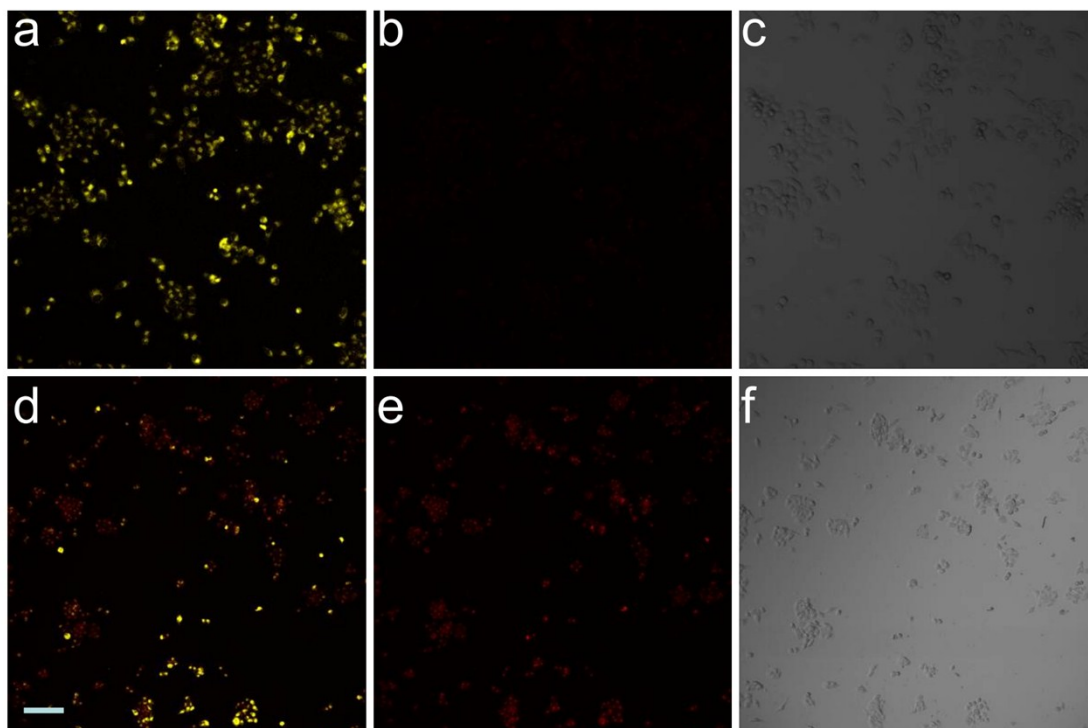

**Figure S19.** Confocal fluorescence images of cells before (a-c) and after starvation-induced autophagy at 2 h (d-e). ( $\lambda_{\text{ex}}=488\text{ nm}$ ,  $\lambda_{\text{em}}=530\text{-}580\text{ nm}$ ;  $\lambda_{\text{ex}}=639\text{ nm}$ ,  $\lambda_{\text{em}}=650\text{-}750\text{ nm}$ ; scale bar= $20\text{ }\mu\text{m}$ .)

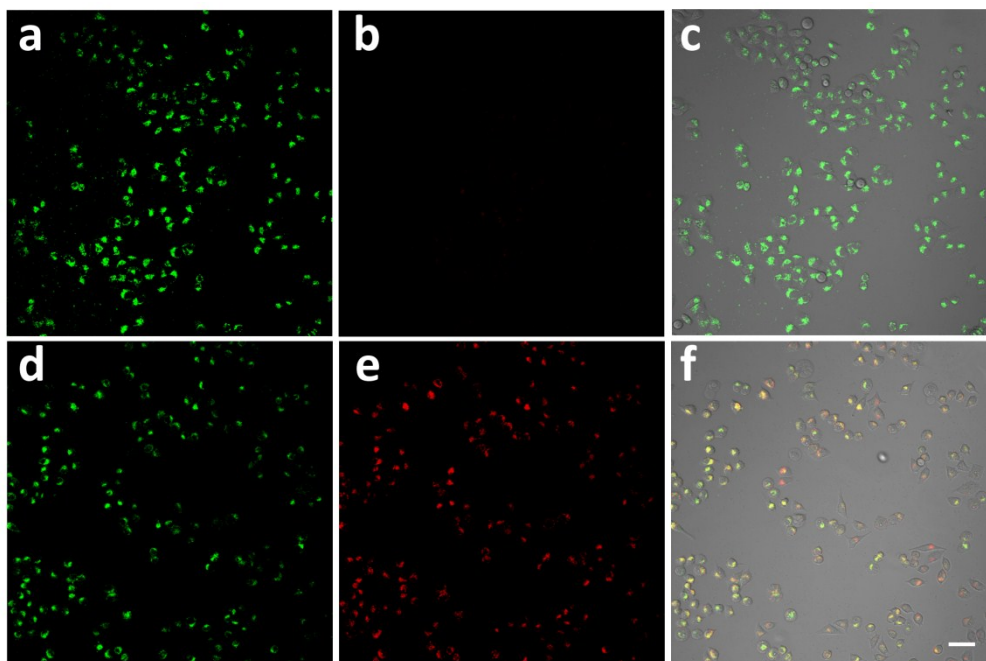

**Figure S20.** Confocal fluorescence images of cells incubated with NH<sub>2</sub>-Cy in normal medium (a-c) and the autophagy caused by rapamycin(d-f) ((a and d,  $\lambda_{\text{ex}}= 488 \text{ nm}$ ,  $\lambda_{\text{em}}= 530\text{-}580 \text{ nm}$ ), (b and e,  $\lambda_{\text{ex}}= 639 \text{ nm}$ ,  $\lambda_{\text{em}}= 650\text{-}750 \text{ nm}$ ), (c and f are merging of the green channel, red channel and bright field) scale bar= $20 \mu\text{m}$ .)

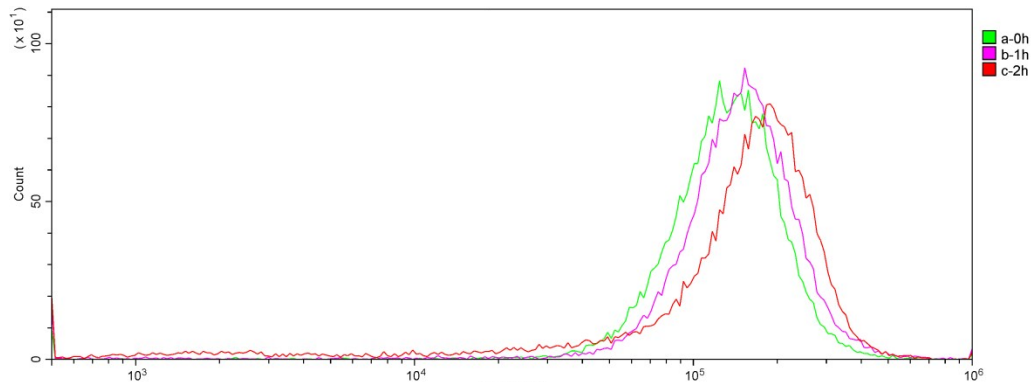

**Figure S21.** Flow Cytometric Assay. The green line represents normal culture of cells after incubating the probe; the purple line represents starvation-induced autophagy for 1 h; the red line represents starvation-induced autophagy for 2 h.

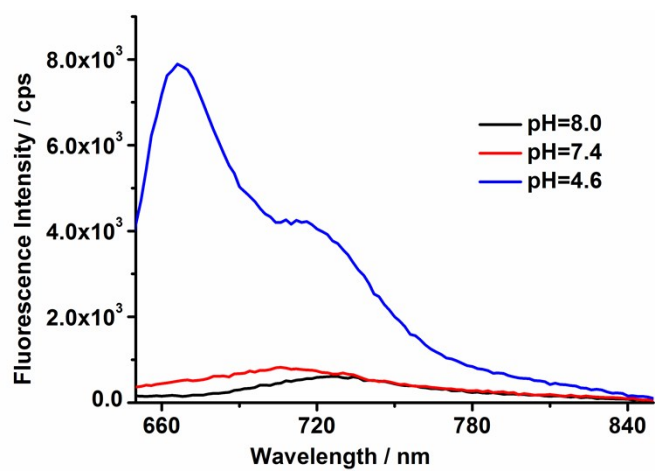

**Figure S22.** The fluorescent spectra of 10 μM probe in different pH contains 1.0% DMSO
